# Supplementary material for: Modification of flexible part in Cu2+ interdigitated framework for CH4/CO2 separation
Source: Royal Society of Chemistry journal article supplement (doi:10.1039/c0cc01294g), 2010-01-01
Supplement: c0cc01294g.pdf [file c0cc01294g.pdf]

## Supporting Information for

# Modification of Flexible Part in Cu<sup>2+</sup> Interdigitated Framework for CH<sub>4</sub>/CO<sub>2</sub> Separation

Yasutaka Inubushi, Satoshi Horike, Tomohiro Fukushima, George Akiyama, Ryotaro Matsuda and Susumu Kitagawa

### Experimental

#### Preparation of 4,4'-dihydroxybiphenyl-3-carboxylic acid (H<sub>3</sub>dhbpc).

Pd(II) acetate (55 mg; 0.23 mmol) was added under argon to a mixture of 5-bromosalicylic acid (5.4 g; 22.4 mmol), sodium carbonate (7.2 g; 68.1 mmol) and 4-methoxyboronic acid (3.8 g; 25 mmol) in water (125 mL). The reaction mixture was stirred at room temperature for 1 h. The resulting slurry was dissolved in hot water (1.3 L) and filtered to give a filtrate and precipitate. The filtrate was acidified with hydrochloric acid. The precipitate was washed with water and dried in vacuo to give 5.3 g (95%) of 4-hydroxy-4'-methoxy-3-biphenylcarboxylic acid.

A solution of 4-hydroxy-4'-methoxy-3-biphenylcarboxylic acid (5.3 g; 21.6 mmol), tetrabutylphosphonium bromide (0.8 g; 2.3 mmol), acetic acid (35 mL) and hydrobromic acid (35 mL of a 48% solution) was heated at reflux for 6 h. The reaction mixture was cooled and poured into water (400 mL). The resulting precipitate was isolated and recrystallised from ethyl acetate to give 2.4 g (47%) of 4,4'-dihydroxybiphenyl-3-carboxylic acid.

#### Preparation of [Cu(dhbpc)<sub>2</sub>(4,4'-bpy)]·2Acetone (2⊃Acetone).

A water solution (20 mL) of Cu(NO<sub>3</sub>)<sub>2</sub>·3H<sub>2</sub>O (0.24 g) was added to a acetone solution (20 mL) of 4,4'-dihydroxybiphenyl-3-carboxylic acid (H<sub>3</sub>dhbpc) (0.74 g) and 4,4'-bipyridyl (0.13 g). After the mixture was allowed to stand for several days at 298 K, a green precipitate was collected, washed with acetone, and dried at 373 K under a vacuum. Elemental analysis for **2**; calc (%): C 63.8; H 3.9; N, 4.1; O 18.9; Cu 9.4. Found (%): C 62.9; H 3.5; N 4.3; O 20.2; Cu 9.2.

#### Single Crystal X-ray Diffraction.

Single crystal X-ray diffraction data collection for **1** was carried out on a Rigaku Saturn diffractometer with graphite monochromated MoK $\alpha$  radiation ( $\lambda = 0.71075 \text{ \AA}$ ) and a CCD two-dimensional detector. Single crystal X-ray diffraction data collection for **2⊃Acetone** was carried

out on a Rigaku Mercury diffractometer with graphite monochromated MoK $\alpha$  radiation ( $\lambda = 0.71070$  Å) and a CCD two-dimensional detector. The crystal structure was solved by a direct method (SIR-97 for **1** and SIR-2004 for **2**→Acetone) and refined by full matrix least squares refinement using the SHELXL-97. The hydrogen atoms were positioned geometry and refined using a riding model.

#### Crystal data of **1** and **2**→Acetone.

Crystal data for **1**. C<sub>24</sub>H<sub>18</sub>CuN<sub>2</sub>O<sub>8</sub>,  $M = 525.96$ , triclinic,  $a = 6.6917(17)$ ,  $b = 8.125(2)$ ,  $c = 11.044(3)$ ,  $\alpha = 84.075(17)$ ,  $\beta = 75.581(14)$ ,  $\gamma = 77.251(18)$ ,  $U = 556.5(3)$ ,  $T = 93(1)$  K, space group  $P-1$  (no. 2),  $Z = 1$ , 8289 reflections measured, 2058 unique ( $R_{\text{int}} = 0.038$ ) which were used in all calculations. The final  $R_1(\text{obs})$  was 0.0393 and  $wR(F_2)$  was 0.096 (all data).

Crystal data for **2**→Acetone. C<sub>42</sub>H<sub>34</sub>CuN<sub>2</sub>O<sub>10</sub>,  $M = 790.25$ , monoclinic,  $a = 23.078(9)$ ,  $b = 11.080(4)$ ,  $c = 15.594(6)$ ,  $\beta = 106.481(4)$ ,  $U = 3824(2)$ ,  $T = 223(2)$  K, space group  $P2/c$  (no. 13),  $Z = 4$ , 55430 reflections measured, 8750 unique ( $R_{\text{int}} = 0.0463$ ) which were used in all calculations. The final  $R_1(\text{obs})$  was 0.0655 and  $wR(F_2)$  was 0.193 (all data).

#### Physical Measurements.

All chemicals and solvents used in the syntheses were of reagent grade and used without further purification. Thermogravimetric analysis (TGA) were performed using a Rigaku Thermo plus TG 8120 apparatus in the temperature range between 298 and 773 K in a N<sub>2</sub> atmosphere and at a heating rate of 10 Kmin<sup>-1</sup>. Elemental analysis was examined using PerkinElmer 2400II for C, H, N. Cu was determined by ICP instrument (Thermo Scientific IRIS-AP). X-ray powder diffraction (XRPD) data were collected on a Rigaku RINT-2200HF (Ultima) diffractometer with CuK $\alpha$  radiation. The adsorption isotherms for CO<sub>2</sub> and CH<sub>4</sub> at 273 K were measured with BELSORP-HP and adsorption isotherms for H<sub>2</sub>O at 298 K were measured with BELSORP-aqua3 volumetric adsorption equipment from BEL JAPAN, INC. The powder pattern of **2** was measured at BL19B2 Synchrotron line of SPring-8 (Super Photon ring-8 GeV), Hyogo, Japan and indexed by using the indexing program DICVOL91 and unit cell refinement was obtained by using the Le Bail fitting method. Obtained parameters are :  $a = 11.861(1)$  Å,  $b = 11.274(1)$  Å,  $c = 6.9254(2)$  Å,  $\alpha = 69.602(2)^\circ$ ,  $\beta = 102.000(3)^\circ$ ,  $\gamma = 113.000(3)^\circ$ ,  $V = 796(1)$  Å<sup>3</sup>,  $R_p = 2.32\%$ ,  $R_{wp} = 3.22\%$ ,  $\chi^2 = 1.52$  (see Figure S4).

#### Selective CO<sub>2</sub> adsorption experiment from CH<sub>4</sub>/CO<sub>2</sub> mixture.

10 mL of round bottom two-neck flask containing powder sample (0.10 g) of whose one neck was closed with septum and syringe with 100 mL of mixed gas (50 mL of CO<sub>2</sub> and CH<sub>4</sub>) and vacuum

pump are connected. The sample was activated by evacuation for three hours at 373 K and set the system in vacuo, and the 100 mL of mixed gas was introduced to the sample until the system reaches 1 atm at 273 K. After three hours the residual gas (1 mL) was picked up from septum and characterized the composition by gas chromatography (Shimazu GC-14B).

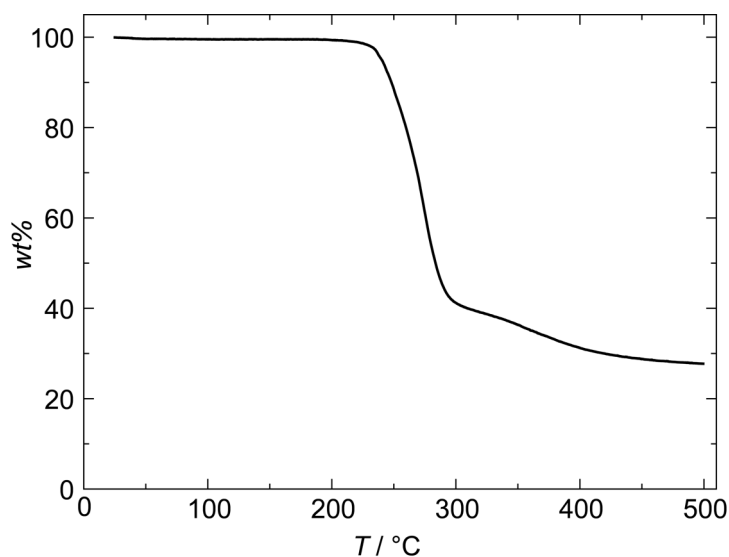

**Figure S1** TGA curve of **2** over the temperature range from 25-500 °C at a heating rate of 5 °C min<sup>-1</sup> under the N<sub>2</sub> atmosphere.

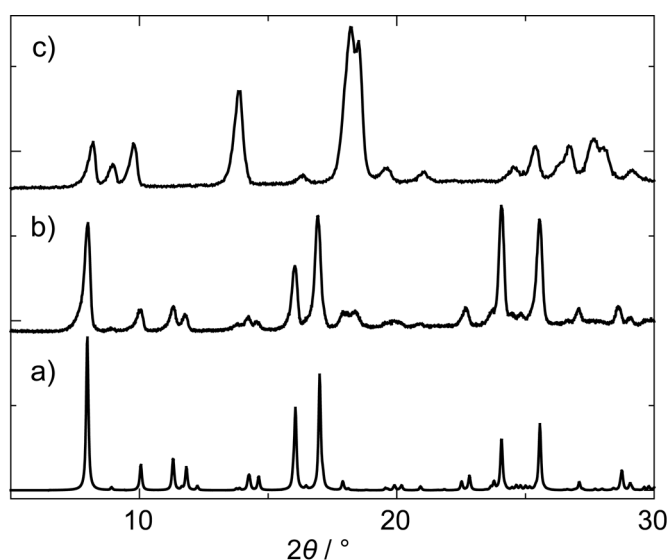

**Figure S3.** Powder X-ray diffractions of (a) simulated pattern of **2**-Acetone from single crystal structure and experimental patterns of (b) **2**-Acetone and (c) **2** (degassed phase).

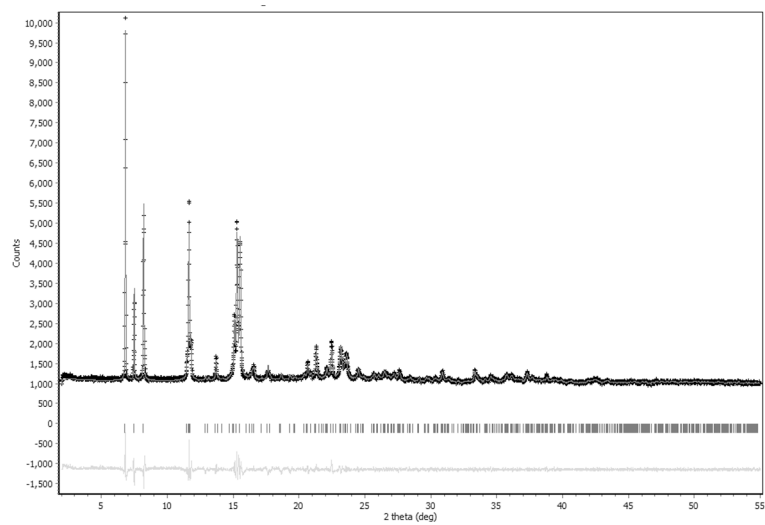

**Figure S4.** Result on the LeBail fitting of **2**.

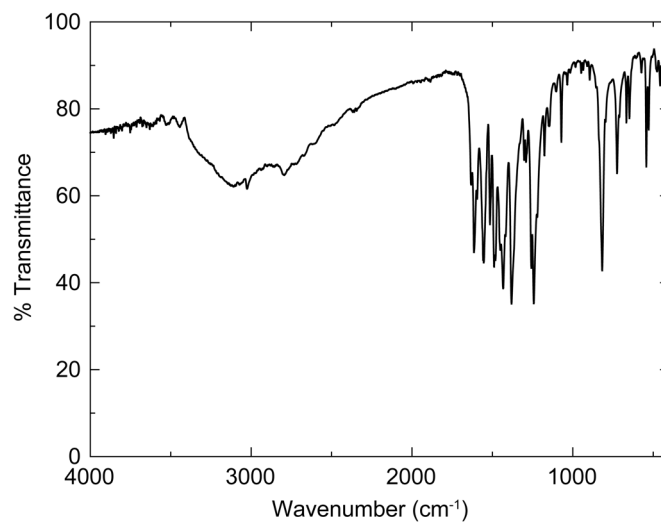

**Figure S5.** IR spectrum of **2**.

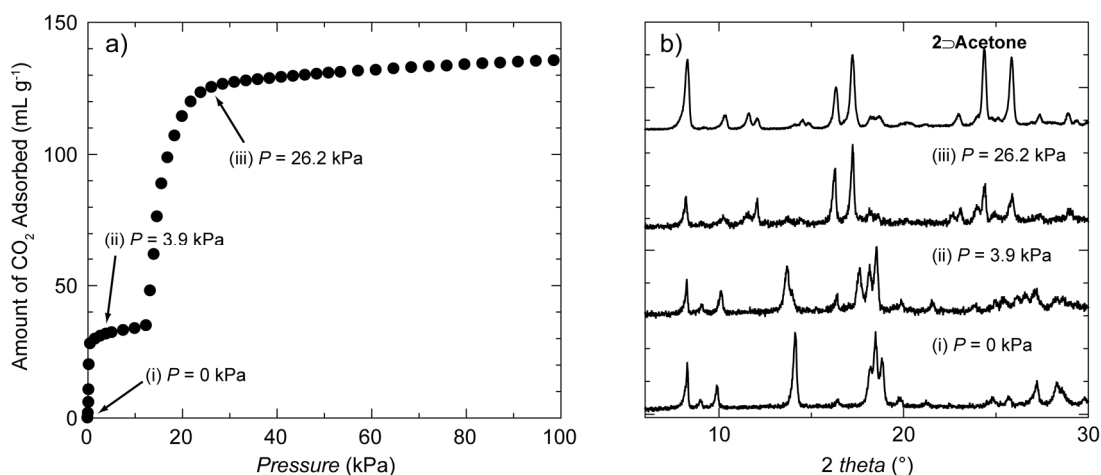

**Figure S6.** Simultaneous measurements of (a) CO<sub>2</sub> adsorption and (b) powder X-ray diffraction for **2** at 195 K. The each pressure point ((i)~(iii)) is corresponding to the powder X-ray diffraction in (b).

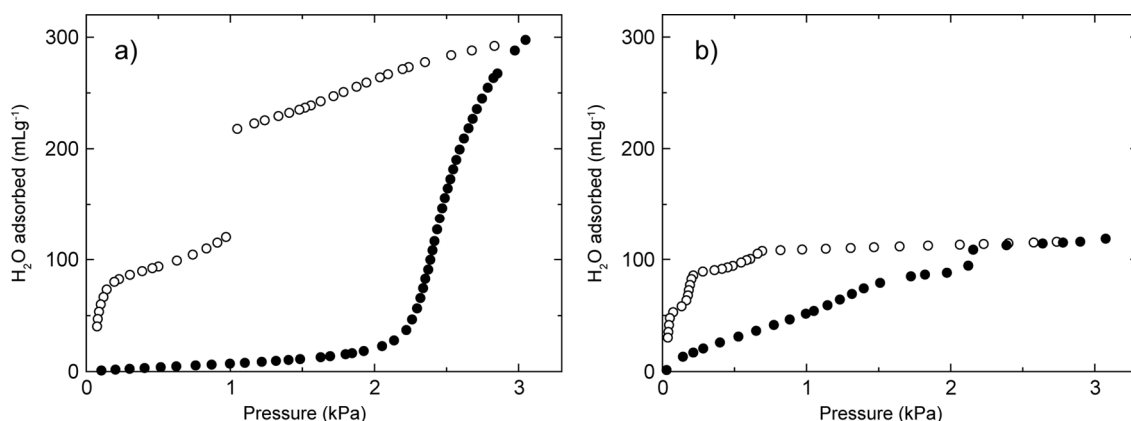

**Figure S7.** Adsorption (closed circle) and desorption (open circle) isotherms of H<sub>2</sub>O for (a) **1** and (b) **2** at 298 K. Abrupt drop at  $P = 1$  kPa in desorption profile in (a) is attributed by structural transformation as guests release.

**Table S1.** Selected lists of reported compounds about adsorption results on CO<sub>2</sub> and CH<sub>4</sub> from single gas component measurement. Note some of values here were obtained from figures of adsorption isotherms in the references.

| Compounds | Adsorption amounts of CO <sub>2</sub> and CH <sub>4</sub> (mLg <sup>-1</sup> ) | Measurement conditions (temperature and pressure) | References         |
|-----------|--------------------------------------------------------------------------------|---------------------------------------------------|--------------------|
| CUK-1     | 87 (CO <sub>2</sub> )                                                          | 298 K, 1 atm                                      | <i>Adv. Mater.</i> |

|                                                                     |                                                   |                            |                                                                      |
|---------------------------------------------------------------------|---------------------------------------------------|----------------------------|----------------------------------------------------------------------|
|                                                                     | 8 (CH <sub>4</sub> )                              |                            | 2007, 19, 1830–1834.                                                 |
| SAPO-34                                                             | 80 (CO <sub>2</sub> )<br>4.5 (CH <sub>4</sub> )   | 295 K, 1 atm               | <i>Microporous and Mesoporous Materials</i><br>2008, 110, 310–317.   |
| [Zn <sub>3</sub> (OH)( <i>p</i> -CDC) <sub>2.5</sub> ] <sup>1</sup> | 67 (CO <sub>2</sub> )<br>27 (CH <sub>4</sub> )    | 298 K, 1 MPa               | <i>Chem. Commun.</i><br>2008, 4135–4137.                             |
| Nitrogen doped carbon nanotubes (CN-3)                              | 85 (CO <sub>2</sub> )<br>29 (CH <sub>4</sub> )    | 273 K, 1 MPa               | <i>Chem. Commun.</i><br>2010, 46, 1308–1310.                         |
| MIL-53                                                              | 18 (CO <sub>2</sub> )<br>trace (CH <sub>4</sub> ) | 304 K, 1 MPa               | <i>Angew. Chem. Int. Ed.</i><br>45, 2006, 7751–7754.                 |
| MIL-120                                                             | 94 (CO <sub>2</sub> )<br>40 (CH <sub>4</sub> )    | 303 K, 1 MPa               | <i>Chem. Mater.</i><br>2009, 21, 5783–5791.                          |
| ZIF-8                                                               | 48 (CO <sub>2</sub> )<br>3.3 (CH <sub>4</sub> )   | Room temperature,<br>1 atm | <i>J. Am. Chem. Soc.</i><br>2010, 132, 76–78.                        |
| NaY zeolite                                                         | 95 (CO <sub>2</sub> )<br>28 (CH <sub>4</sub> )    | 303 K, 1 MPa               | <i>Microporous and Mesoporous Materials</i> ,<br>2009, 119, 117–128. |
| <b>2</b>                                                            | 115 (CO <sub>2</sub> )<br>4.6 (CH <sub>4</sub> )  | 273 K, 0.95 MPa            | This work                                                            |

<sup>1</sup> *p*-CDC<sup>2-</sup> = deprotonated form of 1,12-dihydroxydicarbonyl-1,12-dicarba-*closo*-dodecaborane
